# Supplementary material for: Oxygen vacancies stabilized Ag+to enhance the performance of an Ag/In2O3photocatalyst for non-oxidative coupling of methane
Source: Royal Society of Chemistry journal article supplement (doi:10.1039/d3cy00515a), 2023-01-01
Supplement: d3cy00515a1.pdf [file d3cy00515a1.pdf]

**Appendix A: Supporting Information (SI):**

**Oxygen vacancies stabilized  $\text{Ag}^+$  enhance the performance of  $\text{Ag}/\text{In}_2\text{O}_3$  photocatalyst for nonoxidative coupling of methane**

*Mingquan Xiao<sup>a,c</sup>, Liang Wang<sup>a,b</sup>, Hong Wang<sup>a,b</sup>, Jie Yuan<sup>a,b</sup>, Xun Chen<sup>a</sup>, Zizhong Zhang<sup>a,c</sup>, Xianzhi Fu<sup>a\*</sup>, Wenxin Dai<sup>\*a,c</sup>*

<sup>a</sup> Research Institute of Photocatalysis, State Key Laboratory of Photocatalysis on Energy and Environment, Fuzhou University, Fuzhou, 350108, China

<sup>b</sup> Key Laboratory of Eco-materials Advanced Technology (Fuzhou University), Fujian Province, Fuzhou, 350002, China

<sup>c</sup> Qingyuan Innovation Laboratory, Quanzhou 362801, China.

\*Corresponding author: Wenxin Dai

Tel & Fax: +86-591-83779083

E-mail: [daiwenxin@fzu.edu.cn](mailto:daiwenxin@fzu.edu.cn) & [xzfu@fzu.edu.cn](mailto:xzfu@fzu.edu.cn)

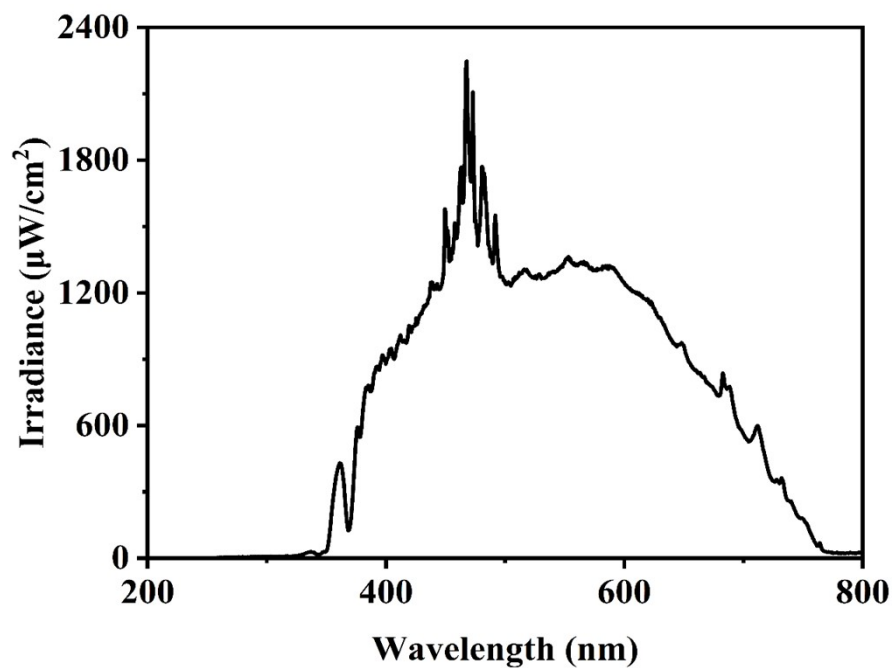

Fig.S1 The spectrogram of the light source used in the experiment.

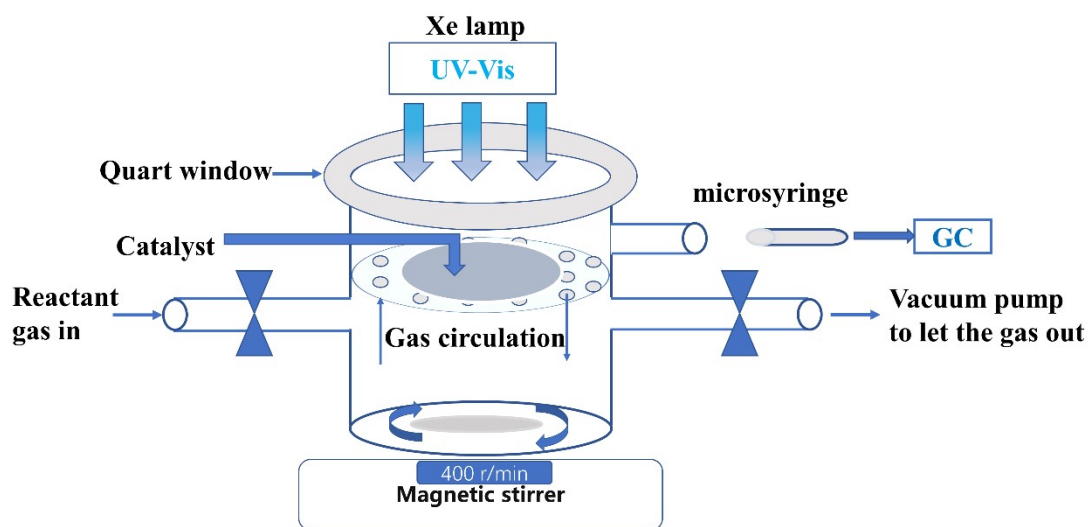

Fig.S2 A schematic diagram of the photocatalytic instrument.

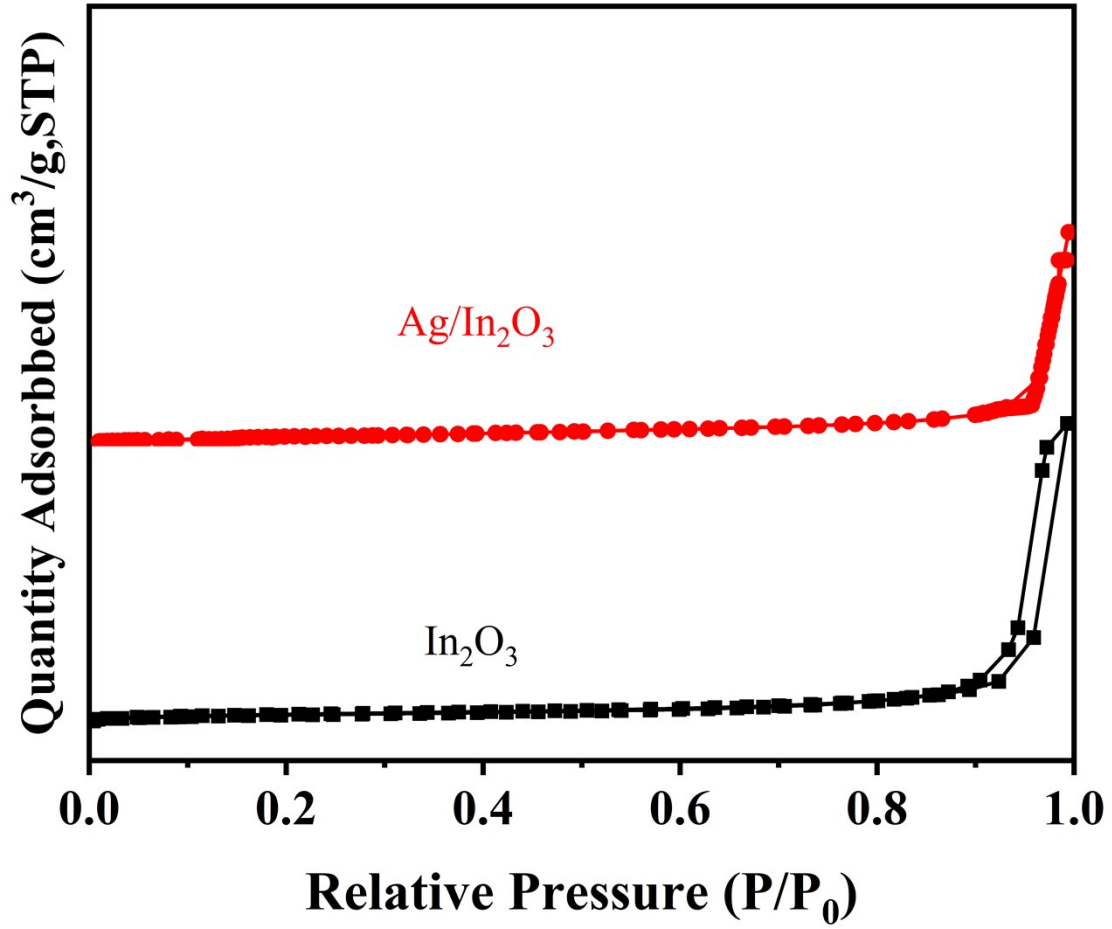

Fig.S3 The N<sub>2</sub> adsorption-desorption isotherms of In<sub>2</sub>O<sub>3</sub> and Ag/In<sub>2</sub>O<sub>3</sub> photocatalysts.

Table S1 The BET surface area and pore parameters of In<sub>2</sub>O<sub>3</sub> and Ag/In<sub>2</sub>O<sub>3</sub> photocatalysts.

| Sample                                    | BET Surface Area<br>(m <sup>2</sup> •g <sup>-1</sup> ) | Pore diameter<br>(nm) | Pore Volume<br>(cm <sup>3</sup> •g <sup>-1</sup> ) |
|-------------------------------------------|--------------------------------------------------------|-----------------------|----------------------------------------------------|
| In <sub>2</sub> O <sub>3</sub>            | 50.5                                                   | 7.3                   | 0.08                                               |
| 0.5 wt% Ag/In <sub>2</sub> O <sub>3</sub> | 30.0                                                   | 11.2                  | 0.08                                               |
| 1 wt% Ag/In <sub>2</sub> O <sub>3</sub>   | 23.1                                                   | 11.1                  | 0.07                                               |
| 2 wt% Ag/In <sub>2</sub> O <sub>3</sub>   | 17.8                                                   | 11.0                  | 0.09                                               |
| 3 wt% Ag/In <sub>2</sub> O <sub>3</sub>   | 17.7                                                   | 19.8                  | 0.10                                               |

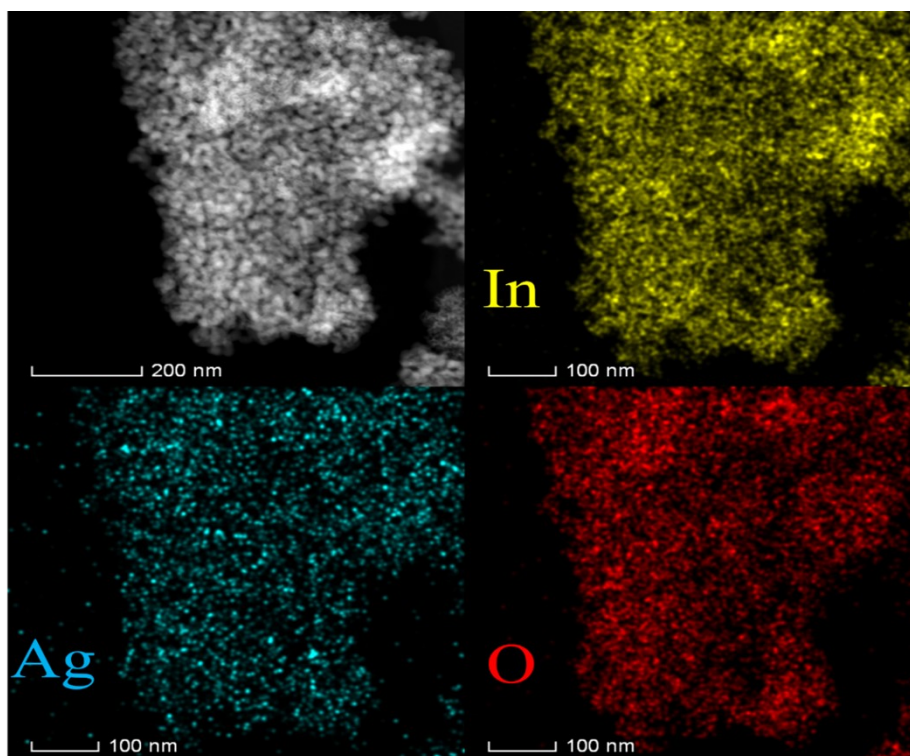

**Fig.S 4** The STEM-HAADF image and corresponding EDX elements mapping images of In, Ag, and O elements of Ag/In<sub>2</sub>O<sub>3</sub>.

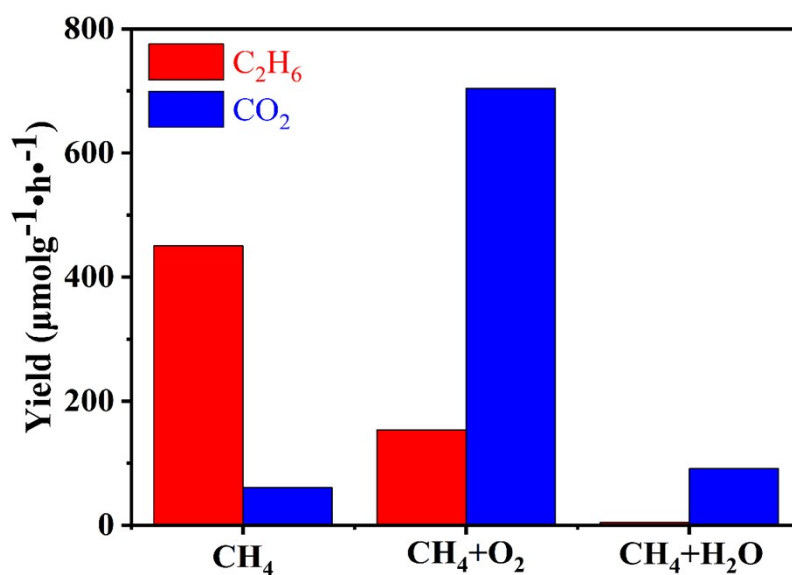

**Fig.S5** The ethane yields using Ag/In<sub>2</sub>O<sub>3</sub> photocatalyst under different conditions.

The results showed that the addition of an oxidant did not increase the yield or selectivity of ethane in Fig.S5.

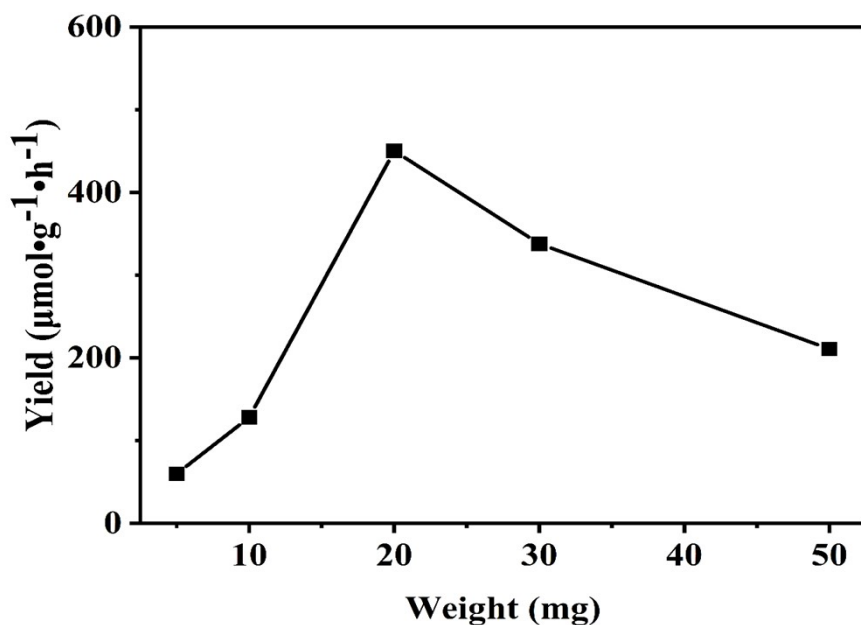

**Fig.S6** The photocatalytic NOCM process over Ag/In<sub>2</sub>O<sub>3</sub> with different amounts of catalysts.

To investigate the relationship between photocatalytic activity and catalyst weight, we conducted activity evaluation tests with different catalyst weights in a certain range. The result showed that the highest yield was achieved with a catalyst mass of 20 mg in Fig.S7. And the yield of ethane is not linearly related to the increasing weight of the photocatalyst.

**Table S2** The result of blank experiments for NOCM over Ag/In<sub>2</sub>O<sub>3</sub> photocatalysts.

| Entry | Reactant | Catalyst | Light | Products                                         |
|-------|----------|----------|-------|--------------------------------------------------|
| 1     | —        | √        | √     | none                                             |
| 2     | √        | —        | √     | none                                             |
| 3     | √        | √        | —     | none                                             |
| 4     | √        | √        | √     | C <sub>2</sub> H <sub>6</sub> and H <sub>2</sub> |

To confirm the importance of individual experimental conditions for methane

coupling, then we conducted control experiments in the absence of methane, photocatalysts, or light irradiation. No ethane was detected, indicating the nature of the reaction was photocatalysis.

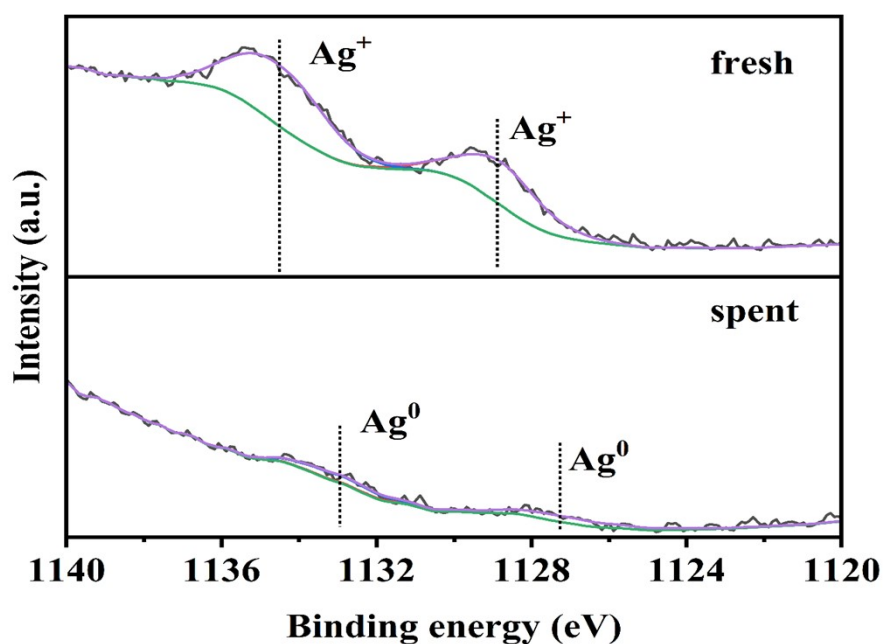

**Fig.S7** The AgM<sub>4</sub>VV Auger spectra of Ag/In<sub>2</sub>O<sub>3</sub> before and after the reaction.

**Table S3** Relative contents of O<sub>Lat</sub> and O<sub>ad</sub> over In<sub>2</sub>O<sub>3</sub> and Ag/In<sub>2</sub>O<sub>3</sub> photocatalysts under different conditions.

| Samples                                    | O <sub>Lat</sub> (%) | O <sub>v</sub> (%) | OH(%) |
|--------------------------------------------|----------------------|--------------------|-------|
| Ag/In <sub>2</sub> O <sub>3</sub> (Before) | 53.86                | 38.96              | 7.17  |
| Ag/In <sub>2</sub> O <sub>3</sub> (After)  | 54.18                | 36.15              | 9.67  |

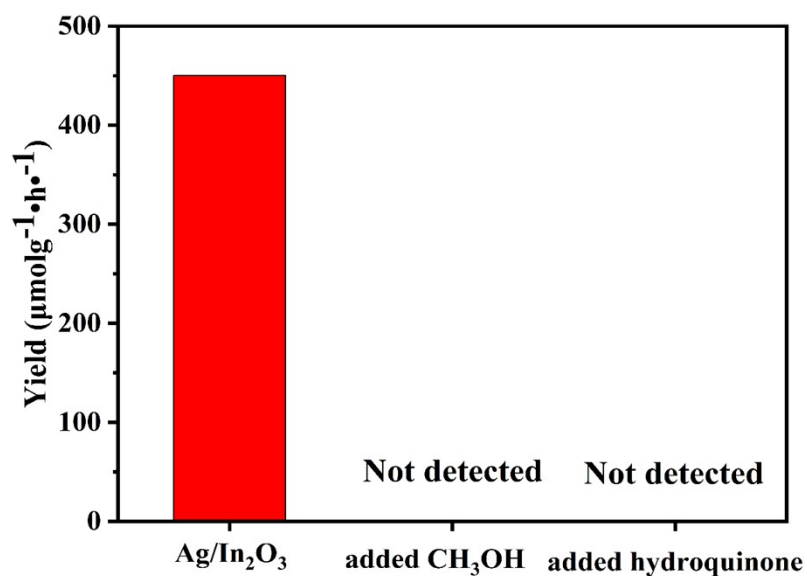

**Fig.S8** The photocatalytic NOCM performance over Ag/In<sub>2</sub>O<sub>3</sub> photocatalyst in the presence of CH<sub>3</sub>OH and hydroquinone.

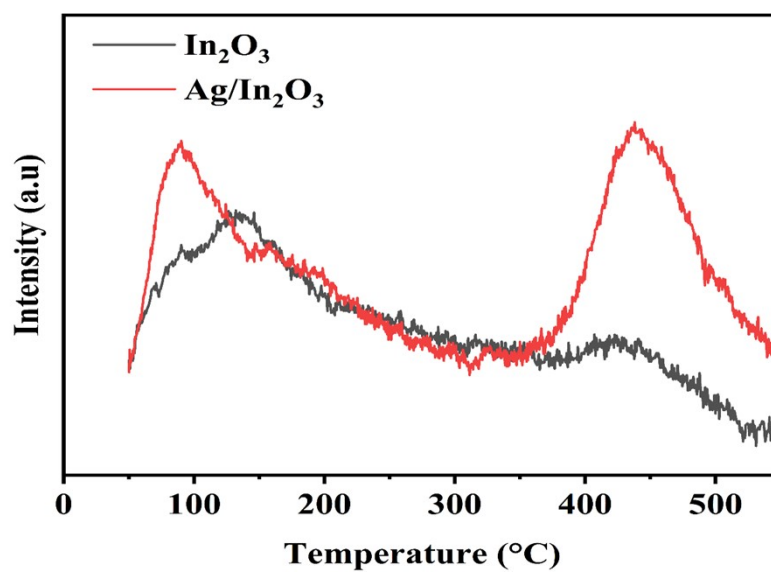

**Fig.S9** The CH<sub>4</sub>-TPD patterns of In<sub>2</sub>O<sub>3</sub> and Ag/In<sub>2</sub>O<sub>3</sub> photocatalysts.

**Table S4** Representative works on photocatalytic NOCM reaction

| Samples | Reactor type | Conditions | The yield rate of C <sub>2</sub> H <sub>6</sub> <sup>a</sup> | References |
|---------|--------------|------------|--------------------------------------------------------------|------------|
|         |              |            |                                                              |            |

---

|                                                                    |               |                                                                  |                            |           |
|--------------------------------------------------------------------|---------------|------------------------------------------------------------------|----------------------------|-----------|
| Ag/In <sub>2</sub> O <sub>3</sub>                                  | Batch reactor | 300 W Xe lamp for 4 h; 20 mg catalyst; 175 mL CH <sub>4</sub>    | 9.0 μmol h <sup>-1</sup>   | This work |
| Al <sub>2</sub> O <sub>3</sub>                                     | Batch reactor | 250 W Xe lamp for 18 h; 1.0 g catalyst; 100 μmol CH <sub>4</sub> | 0.296 μmol h <sup>-1</sup> | [1]       |
| SiO <sub>2</sub> -Al <sub>2</sub> O <sub>3</sub>                   | Batch reactor | 250 W Xe lamp for 18 h; 1.0 g catalyst; 100 μmol CH <sub>4</sub> | 0.328 μmol h <sup>-1</sup> | [1]       |
| SiO <sub>2</sub>                                                   | Batch reactor | 250 W Xe lamp for 3 h; 1.0 g catalyst; 100 μmol CH <sub>4</sub>  | 0.013 μmol h <sup>-1</sup> | [2]       |
| Al <sub>2</sub> O <sub>3</sub> -TiO <sub>2</sub>                   | Batch reactor | 250 W Xe lamp for 3 h; 1.0 g catalyst; 100 μmol CH <sub>4</sub>  | 0.466 μmol h <sup>-1</sup> | [2]       |
| SiO <sub>2</sub> -Al <sub>2</sub> O <sub>3</sub> -TiO <sub>2</sub> | Batch reactor | 250 W Xe lamp for 3 h; 1.0 g catalyst; 100 μmol CH <sub>4</sub>  | 1.65 μmol h <sup>-1</sup>  | [3]       |
| FSM-16                                                             | Batch reactor | 300 W Xe lamp for 3 h; 0.2 g catalyst; 200 μmol CH <sub>4</sub>  | 0.038 μmol h <sup>-1</sup> | [4]       |
| Ga <sub>2</sub> O <sub>3</sub>                                     | Batch reactor | 300 W Xe lamp for                                                | 0.113 μmol h <sup>-1</sup> | [5]       |

---



---

|                                                |                  |                                                                                                     |                               |      |
|------------------------------------------------|------------------|-----------------------------------------------------------------------------------------------------|-------------------------------|------|
|                                                | reactor          | 3 h; 0.2 g catalyst;<br>200 $\mu\text{mol}$ $\text{CH}_4$                                           |                               |      |
| ( $\text{Zn}^+$ , $\text{Zn}^{2+}$ )-<br>ZSM-5 | Batch<br>reactor | 150 W high-<br>pressure Hg lamp<br>for 8 h; 1 g<br>catalyst; 200 $\mu\text{mol}$<br>$\text{CH}_4$   | 9.80 $\mu\text{mol h}^{-1}$   | [6]  |
| Ga-ETS                                         | Batch<br>reactor | 150 W high-<br>pressure Hg lamp<br>for 5 h; 0.2 g<br>catalyst; 200 $\mu\text{mol}$<br>$\text{CH}_4$ | 5.96 $\mu\text{mol h}^{-1}$   | [7]  |
| Au/m-ZnO                                       | Batch<br>reactor | 300 W Xe lamp for<br>4 h; 1 mg catalyst;<br>22.3 $\mu\text{mol}$ $\text{CH}_4$                      | 0.0235 $\mu\text{mol h}^{-1}$ | [8]  |
| Pt/HGTS                                        | Batch<br>reactor | 300 W Xe lamp for<br>4 h; 0.2 g catalyst;<br>44.6 $\mu\text{mol}$ $\text{CH}_4$                     | 0.695 $\mu\text{mol h}^{-1}$  | [9]  |
| Au/TiO <sub>2</sub>                            | Flow<br>reactor  | AM 1.5 G sunlight;<br>5 mg catalyst; 10%<br>$\text{CH}_4$ , 90% Ar,<br>GHSV = 120000                | 2.73 $\mu\text{mol h}^{-1}$   | [10] |

---

---

|                                          |         | $\text{mL}\cdot\text{g}^{-1}\cdot\text{h}^{-1}$                               |                              |      |
|------------------------------------------|---------|-------------------------------------------------------------------------------|------------------------------|------|
| Pd/Ga <sub>2</sub> O <sub>3</sub>        | Flow    | 300 W Xe lamp;                                                                | 1.02 $\mu\text{mol h}^{-1}$  | [11] |
|                                          | reactor | 0.8 g catalyst; 30<br>mL/min gas(10%<br>CH <sub>4</sub> , 90% Ar)flow<br>rate |                              |      |
| Ag-<br>HPW/TiO <sub>2</sub>              | Batch   | 400 W Xe lamp for                                                             | 2.3 $\mu\text{mol h}^{-1}$   | [12] |
|                                          | reactor | 7 h; 0.1 g catalyst;<br>0.3 MPa CH <sub>4</sub>                               |                              |      |
| Pd-<br>Bi/Ga <sub>2</sub> O <sub>3</sub> | Flow    | 300 W Xe lamp;                                                                | 1.1 $\mu\text{mol h}^{-1}$   | [13] |
|                                          | reactor | 0.8 g catalyst; 30<br>mL/min gas(10%<br>CH <sub>4</sub> , 90% Ar)flow<br>rate |                              |      |
| ZnO-AuPd                                 | Batch   | 300 W Xe lamp for                                                             | 0.588 $\mu\text{mol h}^{-1}$ | [14] |
|                                          | reactor | 8 h; 2 mg catalyst;<br>22.3 $\mu\text{mol CH}_4$                              |                              |      |
| Pd/TiO <sub>2</sub>                      | Batch   | 300 W Xe lamp for                                                             | 2.73 $\mu\text{mol h}^{-1}$  | [15] |
|                                          | reactor | 3 h; 3 mg catalyst;<br>0.1 MPa CH <sub>4</sub>                                |                              |      |

---

<sup>a</sup> The reaction rate is not always proportional to the photocatalyst weight.

## References

1. Y. Kato, H. Yoshida and T. Hattori, *Chem. Commun.*, 1998, **21**, 2389-2390.
2. Y. Kato, N. Matsushita, H. Yoshida and T. Hattori, *Catal. Commun.*, 2002, **3**, 99-103.
3. H. Yoshida, N. Matsushita, Y. Kato and T. Hattori, *J. Phys. Chem. B*, 2003, **107**, 8355-8362.
4. L. Yuliati, M. Tsubota, A. Satsuma, H. Itoh and H. Yoshida, *J. Catal.*, 2006, **238**, 214-220.
5. L. Yuliati, T. Hattori, H. Itoh and H. Yoshida, *J. Catal.*, 2008, **257**, 396-402.
6. L. Li, G.-D. Li, C. Yan, X.-Y. Mu, X.-L. Pan, X.-X. Zou, K.-X. Wang and J.-S. Chen, *Angew. Chem. Int. Ed.*, 2011, **50**, 8299-8303.
7. L. Li, Y.-Y. Cai, G.-D. Li, X.-Y. Mu, K.-X. Wang and J.-S. Chen, *Angew. Chem. Int. Ed.*, 2012, **51**, 4702-4706.
8. L. Meng, Z. Chen, Z. Ma, S. He, Y. Hou, H.-H. Li, R. Yuan, X.-H. Huang, X. Wang, X. Wang and J. Long, *Energy Environ. Sci.*, 2018, **11**, 294-298.
9. S. Wu, X. Tan, J. Lei, H. Chen, L. Wang and J. Zhang, *J. Am. Chem. Soc.*, 2019, **141**, 6592-6600.
10. J. Lang, Y. Ma, X. Wu, Y. Jiang and Y. H. Hu, *Green Chem.*, 2020, **22**, 4669-4675.
11. S. P. Singh, A. Anzai, S. Kawaharasaki, A. Yamamoto and H. Yoshida, *Catal. Today*, 2021, **375**, 264-272.
12. X. Yu, V. L. Zholobenko, S. Moldovan, D. Hu, D. Wu, V. V. Ordonsky and A.

- Y. Khodakov, *Nat. Energy*, 2020, **5**, 511-519.
13. S. P. Singh, A. Yamamoto, E. Fudo, A. Tanaka, H. Kominami and H. Yoshida, *ACS Catal.*, 2021, **11**, 13768-13781.
14. W. Jiang, J. Low, K. Mao, D. Duan, S. Chen, W. Liu, C.-W. Pao, J. Ma, S. Sang, C. Shu, X. Zhan, Z. Qi, H. Zhang, Z. Liu, X. Wu, R. Long, L. Song and Y. Xiong, *J. Am. Chem. Soc.*, 2021, **143**, 269-278.
15. W. Zhang, C. Fu, J. Low, D. Duan, J. Ma, W. Jiang, Y. Chen, H. Liu, Z. Qi, R. Long, Y. Yao, X. Li, H. Zhang, Z. Liu, J. Yang, Z. Zou and Y. Xiong, *Nat. Commun.*, 2022, **13**.
